# Supplementary material for: Flow of cerebrospinal fluid is driven by arterial pulsations and is reduced in hypertension
Source: PubMed Central journal article supplement (PMC6242982; doi:10.1038/s41467-018-07318-3), 2018-11-19
Supplement: 41467_2018_7318_MOESM1_ESM.pdf [file 41467_2018_7318_MOESM1_ESM.pdf]

1 **Supplementary Information for “Flow of cerebrospinal fluid is driven by arterial**  
2 **pulsations and is reduced in hypertension” by Mestre *et al.***

3

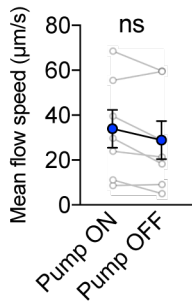

1  
2  
3  
4  
5  
6  
7  
8  
9  
10

**Supplementary Figure 1. Microsphere infusion does not affect perivascular CSF flow speed.** CSF flow measurements collected during microsphere infusion into the cisterna magna (Pump ON) and after the pump was turned off (Pump OFF). Paired t-test,  $P = 0.0624$ , ns: not significant, mean  $\pm$  SEM,  $n = 7$  mice. All velocities plotted or discussed elsewhere were measured after the pump was turned off.

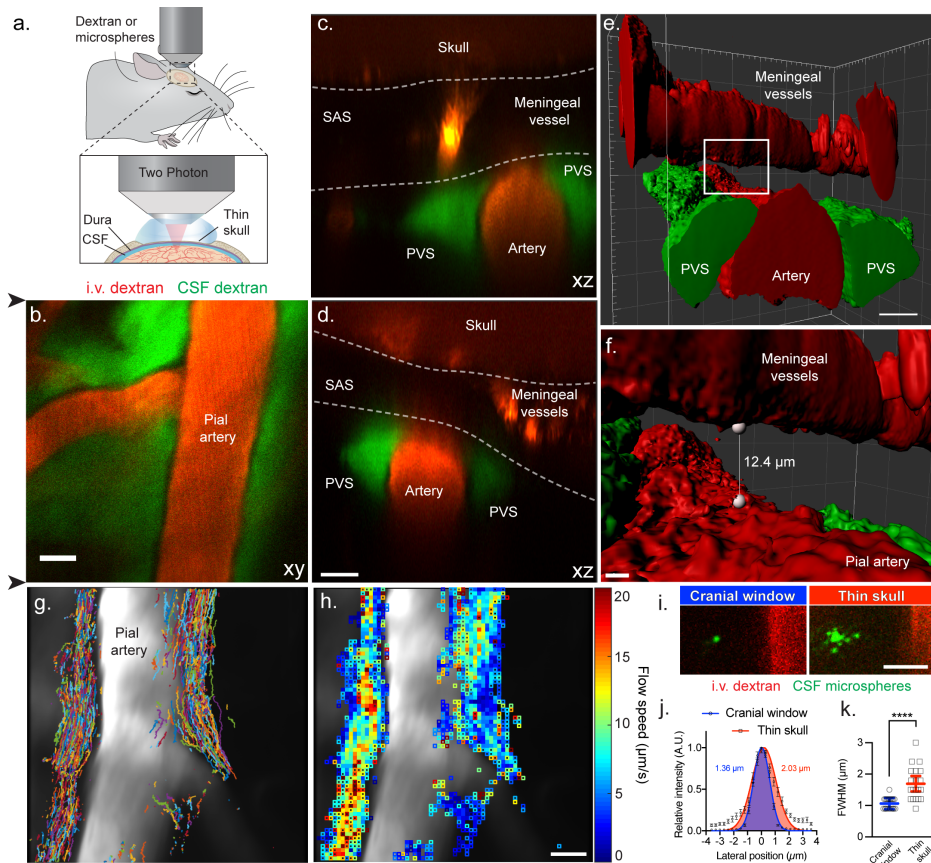

11

1 **Supplementary Figure 2. PVS morphology and flow are unchanged in thinned skull**  
2 **preparations but show a reduced radial point spread function compared to cranial**  
3 **windows. (a)** Anesthetized mice were imaged through a thinned skull after receiving an  
4 intracisternal injection of either 2,000 kDa dextran or fluorescent microspheres and iv  
5 dextran to label the vasculature. **(b)** CSF tracers distribute along PVSs of pial arteries  
6 with a similar morphology to cranial window experiments. Scale bar: 20  $\mu\text{m}$ . **(c)** Orthogonal  
7 projections of a proximal (top black arrow) and **(d)** distal (bottom black arrow) location of  
8 same data shown in (b) indicate subarachnoid space (SAS) between the skull and the  
9 pial surface and two subpial PVSs at each side of the artery. Scale bar: 20  $\mu\text{m}$ . **(e)** Three-  
10 dimensional reconstruction of (b) and **(f)** enlargement of inset in (e) show a gap between  
11 the dural vasculature and the pial artery suggesting that the two PVSs are not an artifact  
12 from the cranial window preparation. **(g)** Particle tracking velocimetry reveals PVS widths  
13 and **(h)** bulk flow speeds comparable to measurements using cranial windows. Scale bar:  
14 20  $\mu\text{m}$ . **(i)** Representative images of single particles from a cranial window (left) and thin  
15 skull (right) experiment showing greater optical aberrations in the latter. Scale bar: 10  
16  $\mu\text{m}$ . **(j)** Average relative intensity distributions of 20 random 1  $\mu\text{m}$  microspheres, mean  $\pm$   
17 SEM. Gaussian functions fit to mean data for a cranial window ( $R^2 = 0.91$ ) and thin skull  
18 ( $R^2 = 0.69$ ) experiment. Full width at half maximum (FWHM) for the fitted function is  
19 presented on the graph and color-coded to the experiment type. **(k)** FWHM size of  
20 microspheres in cranial window ( $1.065 \pm 0.04 \mu\text{m}$ ) and thin skull ( $1.695 \pm 0.12 \mu\text{m}$ )  
21 experiments. Unpaired t-test, \*\*\*\* $P < 0.0001$ , mean  $\pm$  SEM,  $n = 20$  microspheres from a  
22 cranial window or a thin skull experiment.  
23

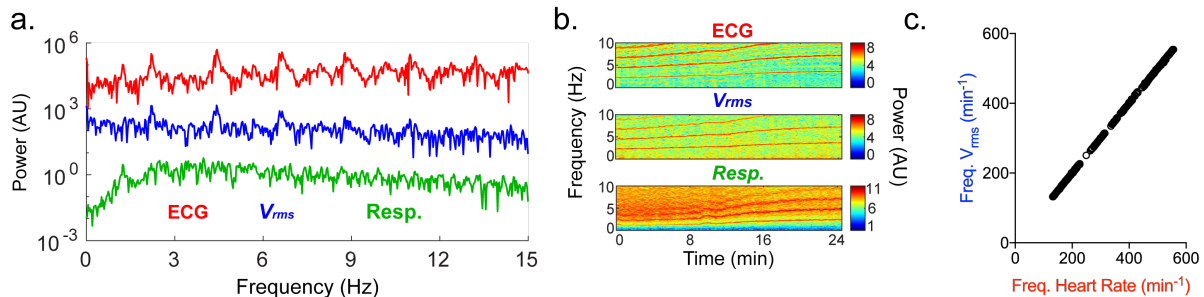

24 **Supplementary Figure 3. CSF flow pulses in synchrony with the cardiac cycle. (a)**  
25 Power spectra in arbitrary units (AU) computed for a 1-minute sample of the ECG,  $v_{\text{rms}}$ ,  
26 and respiration. The spectra for the ECG and  $v_{\text{rms}}$  are remarkably similar in both their  
27 primary frequency ( $f = 2.2 \text{ Hz}$ ) and their harmonics ( $f = 4.4, 6.6, \dots \text{ Hz}$ ). **(b)** Spectrograms  
28 from the full 25-minute time series for each of the 3 signals. As the heart rate increases  
29 from 2.2 to 3.6 Hz (top plot, bottom horizontal red line), the frequency of  $v_{\text{rms}}$  and  
30 respiration rate also increase. **(c)** Dominant frequencies of the ECG and  $v_{\text{rms}}$  for several  
31 1-minute intervals from  $n=8$  mice, indicating that the frequency of oscillations in  $v_{\text{rms}}$  is  
32 locked to the heart rate. Pearson's correlation coefficient,  $R^2 = 0.999$ ,  $P < 0.0001$ .  
33  
34  
35  
36

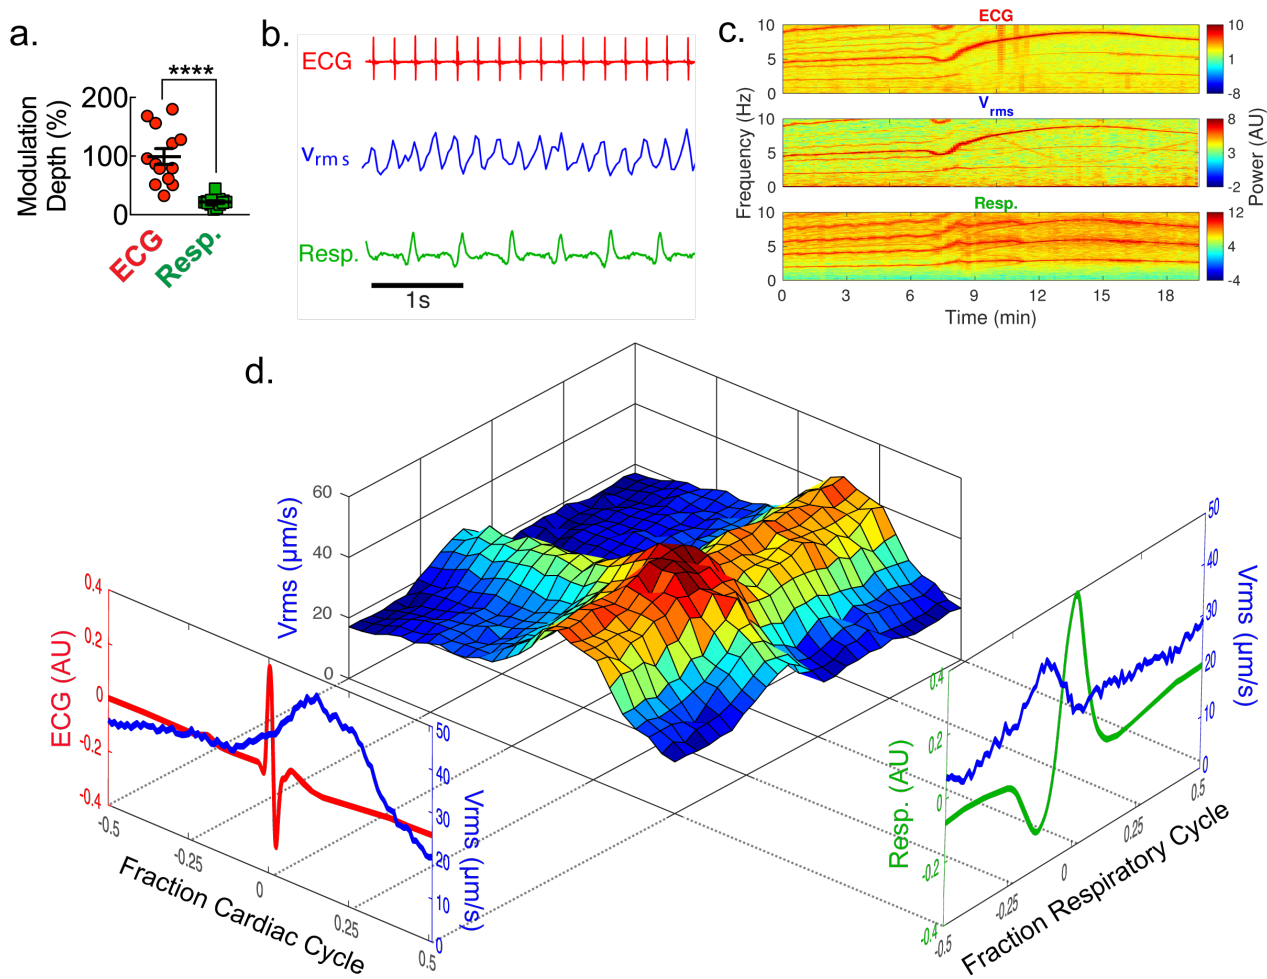

1  
2 **Supplementary Figure 4. Respiratory modulation of CSF fluid flow.** (a) Modulation  
3 depth of  $v_{rms}$  over the cardiac and respiratory cycles, calculated as  $(\text{max}-\text{min})/\text{mean}$ .  
4 Unpaired t-test, \*\*\*\* $P < 0.0001$ , mean  $\pm$  SEM,  $n = 13$  mice. (b) Representative traces of  
5 ECG (red curve),  $v_{rms}$  (blue curve), and respiration (green curve) for the mouse with the  
6 largest respiratory modulation observed. (c) Spectrograms from the full 20-minute time  
7 series for each of the signals. A weak red line corresponding to the primary respiration  
8 frequency ( $f = 2$  Hz) is visible in the top two plots, indicating that the respiratory cycle  
9 affects the heart rate and  $v_{rms}$ . (d)  $v_{rms}$  conditionally averaged over the cardiac and  
10 respiratory cycles. The protruding plots show  $v_{rms}$  averaged over the cardiac (left) and  
11 respiratory (right) cycles alone, which show 86% and 45% modulation, respectively.  
12  
13  
14

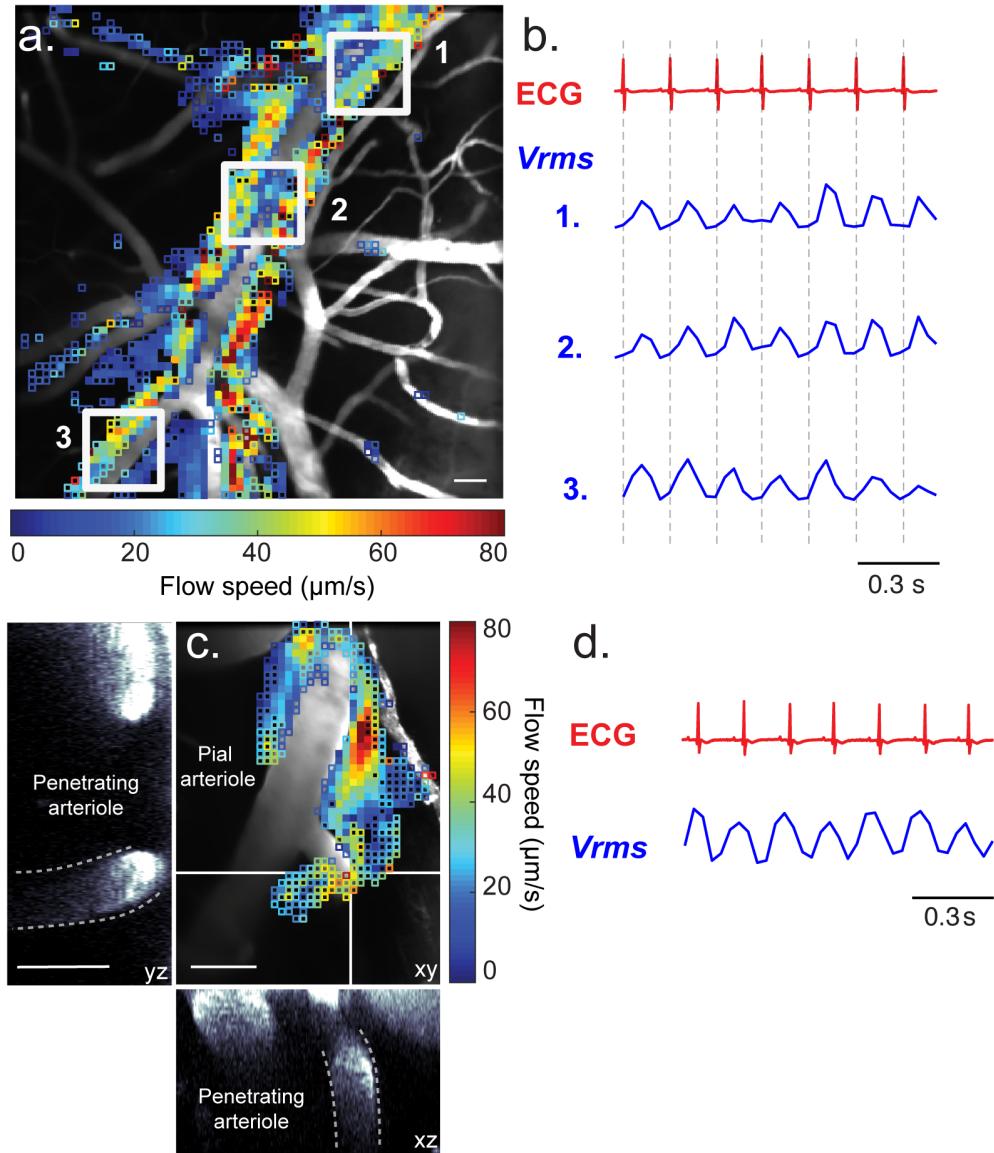

1  
 2 **Supplementary Figure 5. Bulk flow continues down smaller pial arteries towards**  
 3 **penetrating arterioles. (a)** The local time-averaged flow speed in PVs around a smaller  
 4 pial artery, both proximal and distal to bifurcations, is similar to the speed in PVs around  
 5 the MCA (Fig. 1d). Scale bar: 40  $\mu\text{m}$ . **(b)** The root-mean-square velocity ( $v_{\text{rms}}$ ) in the three  
 6 regions indicated in (a), which are separated by several bifurcations, pulses in synchrony  
 7 with the R wave of the electrocardiogram (ECG), like flow near the MCA (Fig. 3). **(c)** The  
 8 local time-averaged flow speed in PVs around a pial arteriole as it dives down into the  
 9 parenchyma is also similar to the speed near the MCA. Scale bar: 40  $\mu\text{m}$ . **Orthogonal**  
 10 **projections** of a z-stack acquired after imaging of (c). Scale bar: 50  $\mu\text{m}$ . **(d)** The  $v_{\text{rms}}$   
 11 where the penetrating arteriole descends into cortex also pulses in synchrony with the  
 12 heart. Microspheres (1  $\mu\text{m}$ ) aggregate at the entry site of the penetrating PVS, preventing  
 13 CSF flow measurements at deeper locations.

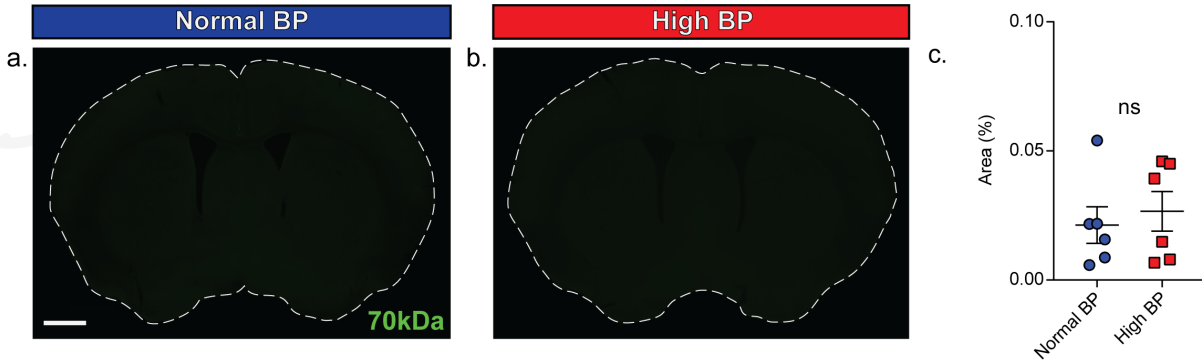

1  
2 **Supplementary Figure 6. Acute hypertension does not disrupt the blood-brain**  
3 **barrier (BBB).** Coronal sections from mice that received either a 30-minute intravenous  
4 infusion of (a) PBS or (b) Ang-II following an i.v. injection of 1% FITC-Dextran (70kDa).  
5 Both images are nearly black because almost no dextran crossed the BBB. Scale bar: 1  
6 mm. (c) Coronal sections from each group were quantified by measuring the percent area  
7 using an automated thresholding method, mean  $\pm$  SEM,  $P>0.05$ ; Unpaired t-test, ns: not  
8 significant. n=6/group.

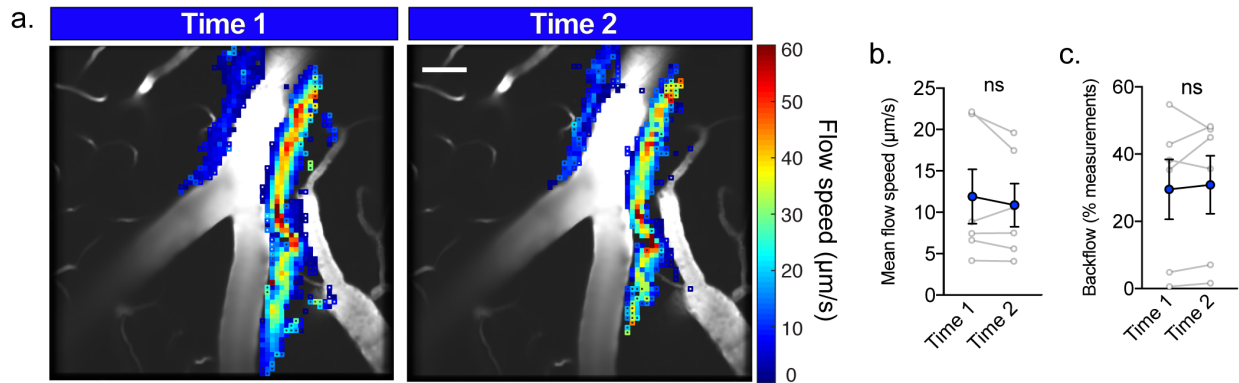

1  
 2 **Supplementary Figure 7. Control mice show no significant change in mean flow**  
 3 **speed over time. (a)** Local time-averaged flow speeds for two intervals of normal blood  
 4 pressure in a control mouse. Closed squares indicate regions with at least 20  
 5 measurements; open squares, fewer than 20. Scale bar: 40 µm. **(b)** The mean flow speed  
 6 does not change significantly from one interval to the next. Paired t-test,  $P = 0.3022$ , ns:  
 7 not significant, mean  $\pm$  SEM, n=6. **(c)** Measurements of percent of backflow for each time  
 8 interval show no significant change. Paired t-test,  $P = 0.5964$ , ns: not significant, mean  $\pm$   
 9 SEM, n=6.

10  
 11  
 12

1

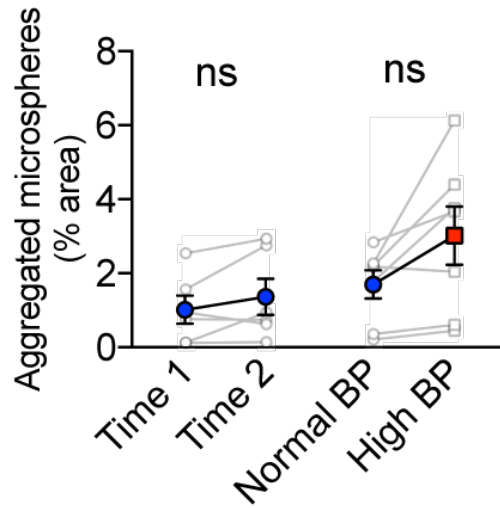

2

3

4

5

6

7

8

9

10

11

12

13

14

15

16

**Supplementary Figure 8. Microsphere aggregation in the PVS** occurs over time and is similar in both hypertension and control groups. Efforts were made to prevent microspheres from aggregating, but a small number become adhered to the PVS wall and remained stationary. We were careful to remove measurements of stagnant particles by masking such regions and also removing particle tracks with small displacements (see Methods). Aggregated microspheres were quantified as % of covered area using a thresholding approach. In mice that received a control infusion of saline (left) and in mice that received an infusion of Ang-II (right) there was an equal degree of microsphere aggregation during the experimental time period. Two-way repeated measures ANOVA, interaction term, ns: not significant,  $P = 0.149$ , mean  $\pm$  SEM,  $n = 6-7$ .



1

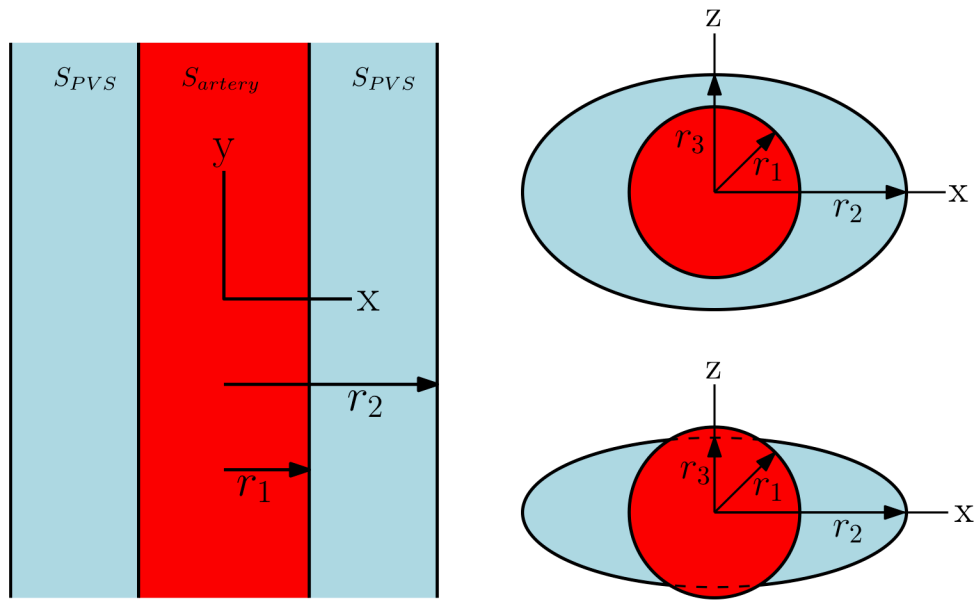

2

3

4

5

6

7

8

9

10

**Supplementary Figure 9. A simplified geometric model of the PVS around the MCA.** Sketches of lateral (left) and cross-sectional (right) areas, comparable to Fig. 1c and 1d, respectively. The size of the PVS is parameterized by the radius of the artery ( $r_1$ ) and the semi-major ( $r_2$ ) and semi-minor ( $r_3$ ) axes of an ellipse forming the outer boundary of the PVS. Prior modeling studies have assumed  $r_3 = r_2$ , such that the PVS is a circular annulus. Our results suggest  $r_2 > r_3 \approx r_1$  and in some cases  $r_3 < r_1$  (bottom right sketch).

| <b>Mouse</b>         | <b>Particle Track Total</b> | <b>Measurement Count Total</b> |
|----------------------|-----------------------------|--------------------------------|
| Control Mouse 1      | 1671                        | 51667                          |
| Control Mouse 2      | 41770                       | 733183                         |
| Control Mouse 3      | 2783                        | 122245                         |
| Control Mouse 4      | 3122                        | 95093                          |
| Control Mouse 5      | 1538                        | 40591                          |
| Control Mouse 6      | 25400                       | 393518                         |
| Hypertension Mouse 1 | 23920                       | 489159                         |
| Hypertension Mouse 2 | 44107                       | 1150323                        |
| Hypertension Mouse 3 | 8770                        | 234809                         |
| Hypertension Mouse 4 | 36995                       | 328868                         |
| Hypertension Mouse 5 | 32878                       | 384797                         |
| Hypertension Mouse 6 | 18193                       | 400086                         |
| Hypertension Mouse 7 | 15316                       | 190830                         |
| Mean $\pm$ SEM       | 19728 $\pm$ 4358            | 355013 $\pm$ 85957             |

1  
2 **Supplementary Table 1. Particle tracking velocimetry measurements.** The total  
3 number of particle tracks is roughly equal to the number of microspheres that enter the  
4 PVS during imaging; the count may differ due to the PTV algorithm failing to track some  
5 microspheres or identifying the same microsphere as two different ones at different  
6 moments. The measurement count total is the total number of microsphere position and  
7 velocity measurements across all tracks for the entire imaging time. Stagnant  
8 microspheres have been excluded from the statistics. Microspheres appeared almost  
9 exclusively in the PVS of the MCA and its downstream branches with only about  $2.5 \pm$   
10  $1.6\%$  of particles appearing outside the space.  
11

## 1 **Supplementary Discussion.**

### 2 Volume of the Perivascular Space

3 One important result of our experiments is that the size of the PVS, as measured  
4 by microsphere trajectories (Fig. 1b) or injected dye (Fig. 2a), is much larger than has  
5 been previously reported. Here we describe an idealized geometric model of the PVS  
6 which allows us to relate the *in vivo* lateral area ratios presented in Fig. 2k to an  
7 approximate volume ratio. Consider the idealized geometry shown in Supplementary Fig.  
8 9. The circle represents the outer boundary of the artery and the ellipse represents the  
9 outer wall of the PVS; each of these extends uniformly in the  $y$ -direction. Let  $r_1$  denote  
10 the radius of the circle and  $r_2$  and  $r_3$  denote the semi-major and semi-minor axes of the  
11 ellipse, respectively. Then the cross-sectional area of the artery is  $A_{artery} = \pi r_1^2$  and the  
12 cross-sectional area of the PVS is  $A_{PVS} = A_{ellipse} - A_{artery} = \pi(r_2 r_3 - r_1^2)$ . Hence, the  
13 ratio of the cross-sectional areas of the artery and the PVS, which is also the ratio of their  
14 respective volumes (per unit length), is

$$15 \quad \frac{V_{PVS}}{V_{artery}} = \frac{A_{PVS}}{A_{artery}} = \frac{r_2 r_3}{r_1^2} - 1. \quad (1)$$

16 Note that if we take  $r_2 = r_3 > r_1$  we have concentric circular cylinders, and if we take  $r_3 =$   
17  $r_1 < r_2$  the circle is tangent to the ellipse at the top and bottom, i.e. the PVS vanishes at  
18 the top and bottom (we refer to this as *two-lobe* geometry). The ratio of the lateral areas  
19 (in the  $x$ - $y$  plane) of the PVS and the artery is

$$20 \quad \alpha = \frac{S_{PVS}}{S_{artery}} = \frac{2(r_2 - r_1)L}{2r_1 L} = \frac{r_2}{r_1} - 1. \quad (2)$$

21 From our experimental data, we find approximately  $\alpha = 1.4$ , which gives  $r_2/r_1 = 2.4$ .

22 Using this value, we can compute the volume ratio for two cases.

1 For the case of concentric cylinders, which has been widely assumed in modeling  
2 studies<sup>1-3</sup>, we have  $r_2 = r_3 = 2.5r_1$ , and equation (4) gives the volume ratio

3 
$$\frac{V_{PVS}}{V_{artery}} = \frac{A_{PVS}}{A_{artery}} = (2.4)^2 - 1 = 4.76. \quad (3)$$

4 For the case of a two-lobe geometry,  $r_3 = r_1$  and equation (4) gives

5 
$$\frac{V_{PVS}}{V_{artery}} = \frac{A_{PVS}}{A_{artery}} = 2.4 - 1 = 1.4. \quad (4)$$

6 Our observation that very few particles cross above the artery suggests the concentric  
7 cylinder model is incorrect, at least near the MCA. The PVS appears to be closer to a  
8 two-lobe geometry, which is supported by *in vivo* x-z cross sections of dye reconstructed  
9 using z-stacks of x-y images (e.g., Fig. 2b). Although in some cases reconstructions  
10 suggest that  $r_3$  is slightly smaller than  $r_1$ , they are often comparable. We are confident in  
11 claiming that the volume (and cross-sectional area) of the PVS is about the same as that  
12 of the artery.

### 13 Polystyrene Microspheres are Accurate Cerebrospinal Fluid Tracers

14 The Stokes number is a positive, dimensionless quantity which characterizes how  
15 accurately a particle suspended in a fluid flow tracks the motion of the fluid (small values  
16 indicate accurate tracers). The Stokes number is defined as

17 
$$St = \frac{2}{9} \frac{\rho_m}{\rho_f} \left(\frac{d}{L}\right)^2 Re \quad (5)$$

18 where  $\rho_m = 1060 \text{ kg m}^{-3}$  is the density of the microspheres,  $\rho_f = 993 \text{ kg m}^{-3}$  is the density  
19 of the cerebrospinal fluid,  $d = 1 \times 10^{-6} \text{ m}$  is the diameter of the microspheres,  $L =$

1  $4.4 \times 10^{-5}$  m is the average PVS width (Fig. 2d), and  $Re = 0.0012$  is the Reynolds number  
2 (Fig. 1k). Hence, the Stokes number is  $St = 1.5 \times 10^{-7}$ , which indicates that the  
3 microspheres track the motion of the cerebrospinal fluid very well.

4

#### 5 Consistency with Prior Modeling Studies

6 Our finding of net perivascular pumping of CSF in the PVS in the same direction  
7 as the blood flow is consistent with theoretical considerations. Computational models of  
8 flows in the perivascular space driven solely by arterial pulsations show that, although  
9 there are localized negative velocities at certain times, the average flow is in the direction  
10 of the pulse wave<sup>1,2,4,5</sup>. Analytical models of perivascular pumping in narrow channels (i.e.,  
11 narrow compared to the wavelength of the arterial traveling wave, which is the case here)  
12 show that in general the net flow consists of an arterial-wall-driven component in the  
13 direction of the arterial wave plus additional flow driven by any overall pressure gradient  
14 that may be present<sup>6</sup>. Wang and Olbricht<sup>1</sup> present an analytical solution for perivascular  
15 pumping in a circular annulus model of the PVS, from which we obtain the following  
16 expression for the average flow velocity, driven purely by the arterial wall motion:

$$17 \quad v = \frac{2R_1^4}{(R_2^2 - R_1^2)^2} \left(\frac{b}{R_1}\right)^2 c, \quad (6)$$

18 where  $R_1$  and  $R_2$  are the inner and outer radii of the annulus,  $b$  is the half-amplitude of  
19 the arterial traveling wave, and  $c$  is the speed of the arterial traveling wave. Typical values  
20 from our data are  $R_1 = 30 \mu\text{m}$ ,  $R_2 = 70$  to  $80 \mu\text{m}$  (average radius of an elliptical PVS),  $b =$   
21  $0.3 \mu\text{m}$ , and  $c = 1 \text{ m s}^{-1}$ , from which we obtain average flow speeds in the range  $v = 5$  to  
22  $10 \mu\text{m s}^{-1}$ , which is remarkable agreement with our experimental measurements,

1 considering the simplifying assumptions in the model. Note also that the expression  
2 above implies that the average flow speed is greater in a narrower annulus, in agreement  
3 with our velocity profiles at locations where the width of the PVS is narrower (Fig. 1e).  
4 Thus, modeling predictions suggest that perivascular pumping alone may account for the  
5 observed flows, although given the uncertainties in the parameter values, we cannot rule  
6 out the possibility that the flow is partially driven by an overall pressure gradient due to,  
7 say, the production of CSF. We note that two-photon imaging is not fast enough to  
8 precisely measure the speed at which the arterial wave propagates through the  
9 vasculature. Our estimate of this speed is 1 m/s, which comes from an approximation of  
10 the heart-to-brain distance divided by the 35 ms delay observed. This is an important  
11 modeling parameter that should be precisely measured in future work.

12

### 13 Previous qualitative studies of cerebrospinal fluid flow in perivascular spaces

14 Many previous studies have inferred CSF flow in PVSs by evaluating the influx of  
15 fluorescent dye<sup>7-13</sup>. In cases where CSF influx is quantified, researchers typically do so  
16 using mean pixel intensities or thresholded area/volume measurements. A limitation of  
17 such approaches is the inability to measure spatially and temporally resolved flow  
18 velocities. Measurement techniques such as particle tracking velocimetry (PTV) or  
19 particle image velocimetry (PIV) require seeding a fluid flow with particles that generate  
20 contrast when imaged (e.g., bright particles with a dark background). This approach  
21 cannot be applied to dyes/tracers which tend to generate smooth intensity profiles with  
22 little to no contrast in the flow. However, the use of larger fluorescent particles (e.g.,

1 diameter 1  $\mu\text{m}$ ) can generate the contrast necessary, enabling quantitative flow  
2 measurements when combined with high temporal and spatial resolution imaging.

3 One other study, contemporary with ours, made initial strides towards  
4 characterizing CSF flows in PVSs using fluorescent microspheres. The *qualitative* results  
5 reported by Bedussi et al.<sup>14</sup> are consistent with the *quantitative* results reported in this  
6 study. Specifically, Bedussi et al. tracked an average of six particles per animal (n=5) in  
7 PVSs and observe that the particles move in a pulsatile manner at frequencies similar to  
8 cardiac cycle frequencies (although imaging was not synchronized to heart rate  
9 measurements), with net motion in the same direction as blood flow. Respiration was  
10 driven with a ventilator at a constant rate; its effects were not addressed. Because the  
11 experiments involved imaging through a thinned skull using single photon microscopy,  
12 resolving individual micron-sized microspheres would have been difficult, and the tracked  
13 particles could be large agglomerations of microspheres (Supplementary Fig. 2i-k). The  
14 two particles shown in their Fig. 1b appear to each have a diameter near 10  $\mu\text{m}$ , which  
15 would substantially alter the flow through a space just 40  $\mu\text{m}$  wide (Fig. 2d). In contrast,  
16 our study involved tracking 20000 individual microspheres on average (Supplementary  
17 Table 1), and we have rigorously shown that the frequency of the flow pulsatility is locked  
18 to the cardiac cycle using hundreds of measurements over tens of minutes (Extended  
19 Data Fig. 3c). Bedussi et al. report 2 s of measurements, which is an insufficient interval  
20 for generating power spectra or spectrograms (Supplementary Fig. 3a-b) to accurately  
21 quantify the frequencies of the heart beat or CSF flow. Of particular concern is their report  
22 of arterial blood velocities in the range of 0.9 to 5.5  $\mu\text{m/s}$ , which is an underestimate by  
23 approximately a factor of 1000<sup>15</sup>. Furthermore, the conclusions of Bedussi et al. directly

1 contradict ours: this study provides ample evidence demonstrating that CSF is driven  
2 primarily by perivascular pumping in the PVSs, which directly refutes their conclusion that  
3 in the absence of valves, pulsations cannot create net flow, and that the flow is driven  
4 entirely by CSF production in the choroid plexus.

5  
6 **References**

- 7 1. Wang, P. & Olbricht, W.L. Fluid mechanics in the perivascular space. *J Theor Biol*  
8 **274**, 52-57 (2011).
- 9 2. Bilston, L.E., Fletcher, D.F., Brodbelt, A.R. & Stoodley, M.A. Arterial pulsation-  
10 driven cerebrospinal fluid flow in the perivascular space: a computational model.  
11 *Comput Methods Biomech Biomed Engin* **6**, 235-241 (2003).
- 12 3. Jin, B.J., Smith, A.J. & Verkman, A.S. Spatial model of convective solute transport  
13 in brain extracellular space does not support a "glymphatic" mechanism. *J Gen*  
14 *Physiol* **148**, 489-501 (2016).
- 15 4. Schley, D., Carare-Nnadi, R., Please, C.P., Perry, V.H. & Weller, R.O.  
16 Mechanisms to explain the reverse perivascular transport of solutes out of the  
17 brain. *J Theor Biol* **238**, 962-974 (2006).
- 18 5. Asgari, M., de Zelicourt, D. & Kurtcuoglu, V. Glymphatic solute transport does not  
19 require bulk flow. *Sci Rep* **6**, 38635 (2016).
- 20 6. Jaffrin, M.Y. & Shapiro, A.H. Peristaltic Pumping. *Annu Rev Fluid Mech* **3**, 13-&  
21 (1971).
- 22 7. Iliff, J.J., *et al.* A paravascular pathway facilitates CSF flow through the brain  
23 parenchyma and the clearance of interstitial solutes, including amyloid beta. *Sci*  
24 *Transl Med* **4**, 147ra111 (2012).
- 25 8. Ichimura, T., Fraser, P.A. & Cserr, H.F. Distribution of extracellular tracers in  
26 perivascular spaces of the rat brain. *Brain Res* **545**, 103-113 (1991).
- 27 9. Hadaczek, P., *et al.* The "perivascular pump" driven by arterial pulsation is a  
28 powerful mechanism for the distribution of therapeutic molecules within the brain.  
29 *Mol Ther* **14**, 69-78 (2006).
- 30 10. Iliff, J.J., *et al.* Cerebral arterial pulsation drives paravascular CSF-interstitial fluid  
31 exchange in the murine brain. *J Neurosci* **33**, 18190-18199 (2013).
- 32 11. Bedussi, B., *et al.* Paravascular channels, cisterns, and the subarachnoid space in  
33 the rat brain: A single compartment with preferential pathways. *J Cereb Blood Flow*  
34 *Metab* **37**, 1374-1385 (2017).
- 35 12. Rennels, M.L., Gregory, T.F., Blaumanis, O.R., Fujimoto, K. & Grady, P.A.  
36 Evidence for a 'paravascular' fluid circulation in the mammalian central nervous  
37 system, provided by the rapid distribution of tracer protein throughout the brain  
38 from the subarachnoid space. *Brain Res* **326**, 47-63 (1985).
- 39 13. Arbel-Ornath, M., *et al.* Interstitial fluid drainage is impaired in ischemic stroke and  
40 Alzheimer's disease mouse models. *Acta Neuropathol* **126**, 353-364 (2013).



- 1 14. Bedussi, B., Almasian, M., de Vos, J., VanBavel, E. & Bakker, E.N. Paravascular  
2 spaces at the brain surface: Low resistance pathways for cerebrospinal fluid flow.  
3 *J Cereb Blood Flow Metab*, 271678X17737984 (2017).
- 4 15. Santisakultarm, T.P., *et al.* In vivo two-photon excited fluorescence microscopy  
5 reveals cardiac- and respiration-dependent pulsatile blood flow in cortical blood  
6 vessels in mice. *Am J Physiol Heart Circ Physiol* **302**, H1367-1377 (2012).
- 7
